# Supplementary material for: 1,3-Digermacyclobutanes with exocyclic CP and CPS double bonds
Source: Royal Society of Chemistry journal article supplement (doi:10.1039/b708308d), 2007-01-01
Supplement: b708308d.pdf [file b708308d.pdf]

## Supplementary Information

### 1,3-Digermacyclobutanes with exocyclic C=P and C=P=S double bonds

Petronela Maria Petrar<sup>a,b</sup>, Gabriela Nemes<sup>a</sup>, Ioan Silaghi-Dumitrescu<sup>a\*</sup>, Henri Ranaivonjatovo<sup>b</sup>, Heinz Gornitzka<sup>b</sup> and Jean Escudie<sup>b\*</sup>

#### S1

##### Mes\*P=C(Cl)Ge(F)*t*Bu<sub>2</sub> **1**.

NMR data for **1** (solvent CDCl<sub>3</sub>)  $\delta^1\text{H}$  (300 MHz) 1.23 (d,  $^4J_{\text{HF}} = 1.2$  Hz, *t*BuGe), 1.29 (s, *p-t*Bu), 1.47 (s, *o-t*Bu), 7.38 (d,  $^4J_{\text{PH}} = 1.4$  Hz, arom. H);

$\delta^{13}\text{C}$  (75.5 MHz) 28.10 (*Me*<sub>3</sub>C of *t*BuGe), 31.33 (*p-Me*<sub>3</sub>C of Mes\*P), 32.94 (d,  $^4J_{\text{CP}} = 6.7$  Hz, *o-Me*<sub>3</sub>C of Mes\*P), 33.00 (dd,  $^2J_{\text{C-F}}$  and  $^3J_{\text{C-P}} = 3.3$  and 8.3 Hz, *Me*<sub>3</sub>C of *t*Bu), 35.03, (s, *p-Me*<sub>3</sub>C of Mes\*P), 37.85 (*o-Me*<sub>3</sub>C of Mes\*P), 122.00 (*m-C* of Mes\*), 134.19 (dd, *ipso-C*,  $^1J_{\text{CP}} = 67.15$ ,  $^4J_{\text{CF}} = 2.3$  Hz), 150.60 (*p-C* of Mes\*), 153.54 (d, *o-C* of Mes\*,  $^2J_{\text{CP}} = 2.3$  Hz), 165.27 (dd,  $^1J_{\text{CP}} = 91.0$  Hz,  $^2J_{\text{CF}} = 4.5$  Hz, C=P);

$\delta^{19}\text{F}$  (188.3 MHz, CF<sub>3</sub>COOH) -135.4;

$\delta^{31}\text{P}$  (121.5 MHz) 293.5 (d,  $^3J_{\text{PF}} = 45.8$  Hz);

MS (EI, *m/z*): 515 (*M*<sup>+</sup> – Me), 1), 473 (*M* – *t*Bu, 3), 417 (*M* – 2*t*Bu + 1, 10), 323 (Mes\*P=C(Cl), 8), 289 (Mes\*P=CH, 60), 57 (*t*Bu, 100);

Found : C 61.02; H, 9.04, C<sub>27</sub>H<sub>47</sub>ClFGeP requires C 61.22; H, 8.94%.

##### 2,4-Diphosphenylidene-1,3-digermacyclobutane **3**

mp = 309 °C (**3a**), mp = 301 °C (**3b**);

NMR data for **3** (solvent CDCl<sub>3</sub>); **3a**  $\delta^1\text{H}$  (300 MHz) 0.56 (s, *t*BuGe), 1.23 and 1.32 (2s, *p-t*Bu and *t*BuGe), 1.47 (s, *o-t*Bu), 7.07 (s, arom. H);

$\delta^{31}\text{P}$  (121.5 MHz) 367.4.

**3b**  $\delta^1\text{H}$  (300 MHz) 0.94, 1.19 and 1.50 (3s, *t*Bu), 7.13 (s, arom. H);

$\delta^{31}\text{P}$  (121.5 MHz) 367.7.

$\delta^{13}\text{C}$  (75.5 MHz) mixture of **3a/3b**: 31.32, 31.39, 31.47, 31.62, 31.68 and 35.11 (*Me*<sub>3</sub>CC), 34.22, 34.51, 34.57, 34.74 and 39.04 (*Me*<sub>3</sub>CC), 119.51, 121.47 and 121.64 (*m-C* of Mes\*),

148.42, 149.96, 153.12 and 153.19 (arom C), 204.0 (dd,  $^1J_{CP} = 96.6$  Hz,  $^3J_{CP} = 25.7$  Hz, C=P) (**3a**), 204.3 (dd,  $^1J_{CP} = 92.0$  Hz,  $^3J_{CP} = 24.9$  Hz, C=P) (**3b**);

MS (EI, m/z): 893 ( $M^+ - tBu$ , 8), 721 ( $M - 4tBu - 1$ , 5), 705 ( $M - Mes^* 2$ ), 665 ( $M - 5tBu$ , 5), 649 ( $M - 5tBu - MeH$ , 5), 605 ( $M - Mes^*P=C - tBu$ , 20), 275 ( $Mes^*P - 1$ , 10), 57 ( $tBu$ , 100);

Found: C 68.03 ; H, 10.04,  $C_{54}H_{94}Ge_2P_2$  requires C 68.24; H, 9.97%.

### **2,4-Bis(thioxophosphoranylidene)-1,3-digermacyclobutane 5.**

$\delta^{31}P$  (121.5 MHz) 184.4 (**5a**), 183.7 (**5b**).

**5a/5b**  $\delta^1H$  (300 MHz) 0.61, 1.13, 1.25, 1.26, 1.53 and 1.67 (6s, 90H,  $Me_3C$ ), 7.24 – 7.46 (m, 4H, arom H).

$\delta^{13}C$  (75.5 MHz) 31.03, 31.55, 31.65, 32.47, 33.31, 33.93 and 34.17 ( $Me_3C$ ), 32.72, 34.81, 34.95, 35.02 and 35.93 ( $Me_3C$ ), 119.49, 120.998 and 122.60 ( $m-C$  of  $Mes^*$ ), 149.92, 150.82, 152.83, 153.25 and 156.75 (arom C), 159.3 – 164.2 (m, C=P);

$\delta^{31}P$  (121.5 MHz) 184.4 (**5a**), 183.7 (**5b**);

MS (EI, m/z): 957 ( $M^+ - tBu$ , 10), 941 ( $M - tBu - MeH$ , 5), 737 ( $M - Mes^* - S$ ), 509 ( $M/2 + 1$ , 10), 275 ( $Mes^*P - 1$ , 20), 57 ( $tBu$ , 100);

Found: C 64.05; H, 9.14,  $C_{54}H_{94}Ge_2P_2S_2$  requires C 63.93; H, 9.34%.

Derivative 3a

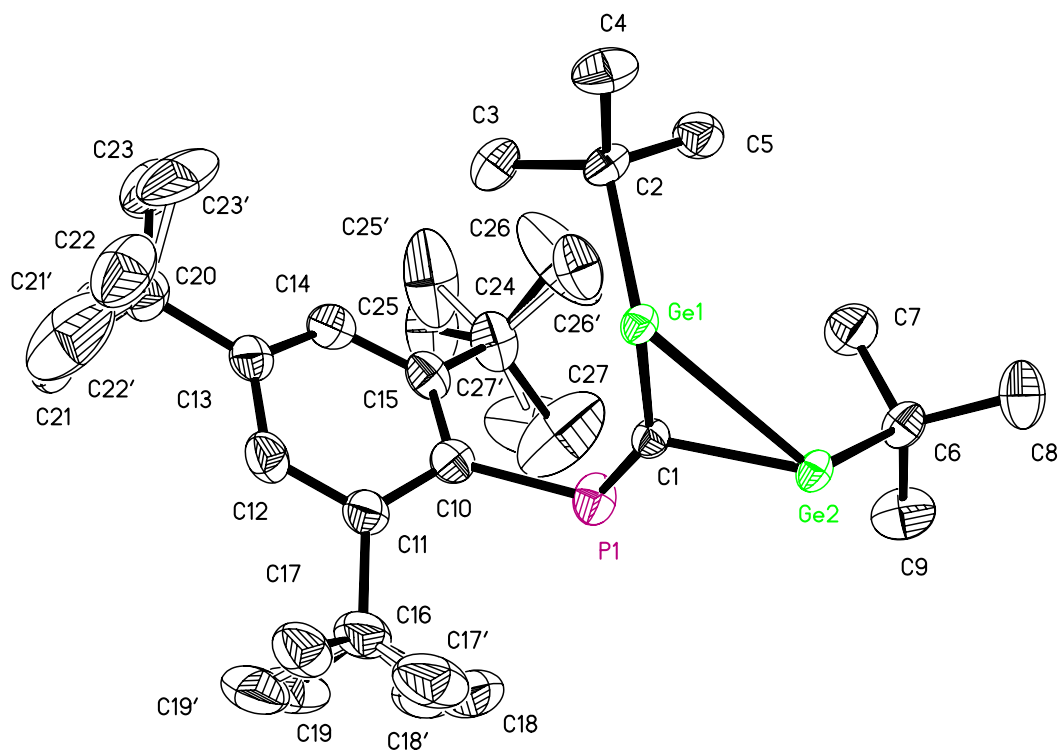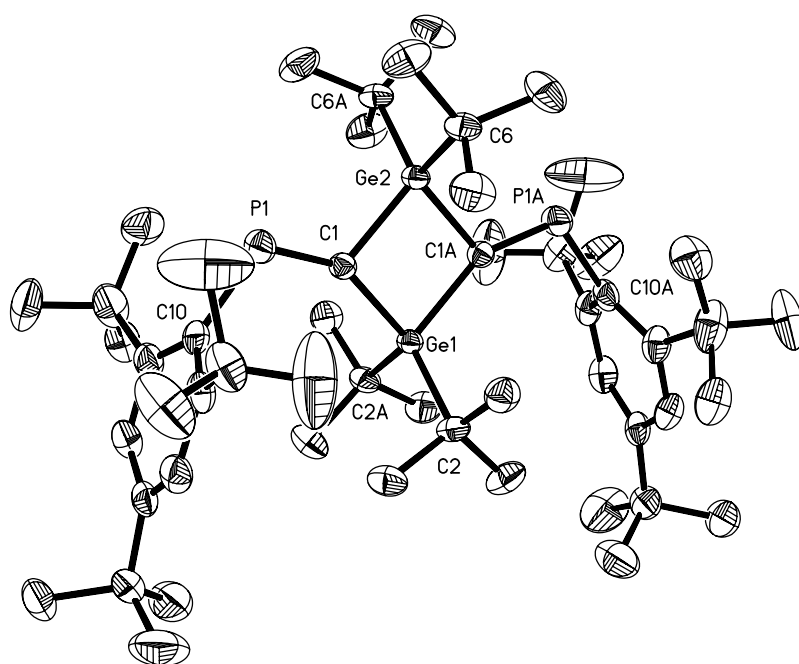

Table 1. Crystal data and structure refinement for **3a**.

|                                   |                                                                |                  |
|-----------------------------------|----------------------------------------------------------------|------------------|
| Identification code               | <b>3a</b>                                                      |                  |
| Empirical formula                 | C <sub>54</sub> H <sub>94</sub> Ge <sub>2</sub> P <sub>2</sub> |                  |
| Formula weight                    | 950.41                                                         |                  |
| Temperature                       | 173(2) K                                                       |                  |
| Wavelength                        | 0.71073 Å                                                      |                  |
| Crystal system                    | Monoclinic                                                     |                  |
| Space group                       | C2/c                                                           |                  |
| Unit cell dimensions              | a = 33.039(3) Å                                                | α = 90°.         |
|                                   | b = 10.8738(11) Å                                              | β = 115.321(2)°. |
|                                   | c = 17.1736(17) Å                                              | γ = 90°.         |
| Volume                            | 5577.0(10) Å <sup>3</sup>                                      |                  |
| Z                                 | 4                                                              |                  |
| Density (calculated)              | 1.132 Mg/m <sup>3</sup>                                        |                  |
| Absorption coefficient            | 1.166 mm <sup>-1</sup>                                         |                  |
| F(000)                            | 2048                                                           |                  |
| Crystal size                      | 0.1 x 0.2 x 0.5 mm <sup>3</sup>                                |                  |
| Theta range for data collection   | 2.22 to 26.43°.                                                |                  |
| Index ranges                      | -40 ≤ h ≤ 41, -12 ≤ k ≤ 13, -21 ≤ l ≤ 17                       |                  |
| Reflections collected             | 16226                                                          |                  |
| Independent reflections           | 5722 [R(int) = 0.0595]                                         |                  |
| Completeness to theta = 26.43°    | 99.6 %                                                         |                  |
| Absorption correction             | Semi-empirical                                                 |                  |
| Max. and min. transmission        | 1.000000 and 0.749303                                          |                  |
| Refinement method                 | Full-matrix least-squares on F <sup>2</sup>                    |                  |
| Data / restraints / parameters    | 5722 / 90 / 354                                                |                  |
| Goodness-of-fit on F <sup>2</sup> | 1.036                                                          |                  |
| Final R indices [I > 2σ(I)]       | R1 = 0.0343, wR2 = 0.0945                                      |                  |
| R indices (all data)              | R1 = 0.0435, wR2 = 0.0997                                      |                  |
| Largest diff. peak and hole       | 1.584 and -0.336 e.Å <sup>-3</sup>                             |                  |

Derivative **3b**

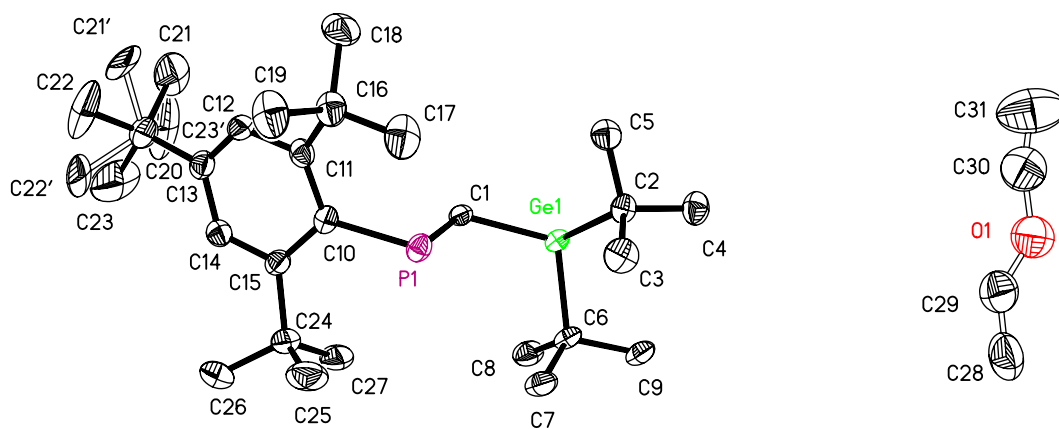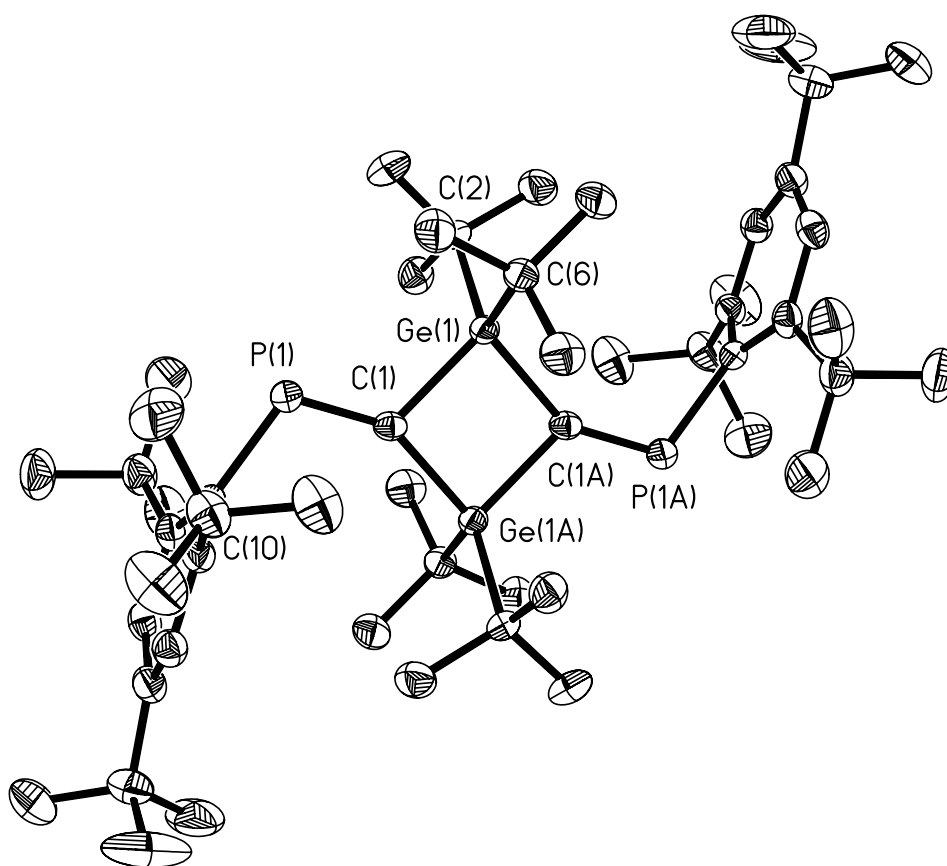

Table 1. Crystal data and structure refinement for **3b**.

|                                   |                                                                                |                    |
|-----------------------------------|--------------------------------------------------------------------------------|--------------------|
| Identification code               | <b>3b</b>                                                                      |                    |
| Empirical formula                 | C <sub>58</sub> H <sub>104</sub> Ge <sub>2</sub> O <sub>1</sub> P <sub>2</sub> |                    |
| Formula weight                    | 1024.54                                                                        |                    |
| Temperature                       | 173(2) K                                                                       |                    |
| Wavelength                        | 0.71073 Å                                                                      |                    |
| Crystal system                    | Monoclinic                                                                     |                    |
| Space group                       | C2/c                                                                           |                    |
| Unit cell dimensions              | a = 35.416(2) Å                                                                | α = 90°.           |
|                                   | b = 10.6099(7) Å                                                               | β = 101.1090(10)°. |
|                                   | c = 16.2868(11) Å                                                              | γ = 90°.           |
| Volume                            | 6005.3(7) Å <sup>3</sup>                                                       |                    |
| Z                                 | 4                                                                              |                    |
| Density (calculated)              | 1.133 Mg/m <sup>3</sup>                                                        |                    |
| Absorption coefficient            | 1.089 mm <sup>-1</sup>                                                         |                    |
| F(000)                            | 2216                                                                           |                    |
| Crystal size                      | 0.05 x 0.3 x 0.3 mm <sup>3</sup>                                               |                    |
| Theta range for data collection   | 5.10 to 24.71°.                                                                |                    |
| Index ranges                      | -41 ≤ h ≤ 41, -12 ≤ k ≤ 11, -19 ≤ l ≤ 13                                       |                    |
| Reflections collected             | 14909                                                                          |                    |
| Independent reflections           | 5077 [R(int) = 0.0577]                                                         |                    |
| Completeness to theta = 24.71°    | 99.0 %                                                                         |                    |
| Absorption correction             | Semi-empirical                                                                 |                    |
| Max. and min. transmission        | 1.000000 and 0.730951                                                          |                    |
| Refinement method                 | Full-matrix least-squares on F <sup>2</sup>                                    |                    |
| Data / restraints / parameters    | 5077 / 88 / 345                                                                |                    |
| Goodness-of-fit on F <sup>2</sup> | 0.997                                                                          |                    |
| Final R indices [I > 2σ(I)]       | R1 = 0.0386, wR2 = 0.0748                                                      |                    |
| R indices (all data)              | R1 = 0.0726, wR2 = 0.0847                                                      |                    |
| Largest diff. peak and hole       | 0.386 and -0.290 e.Å <sup>-3</sup>                                             |                    |

Derivative **5a**

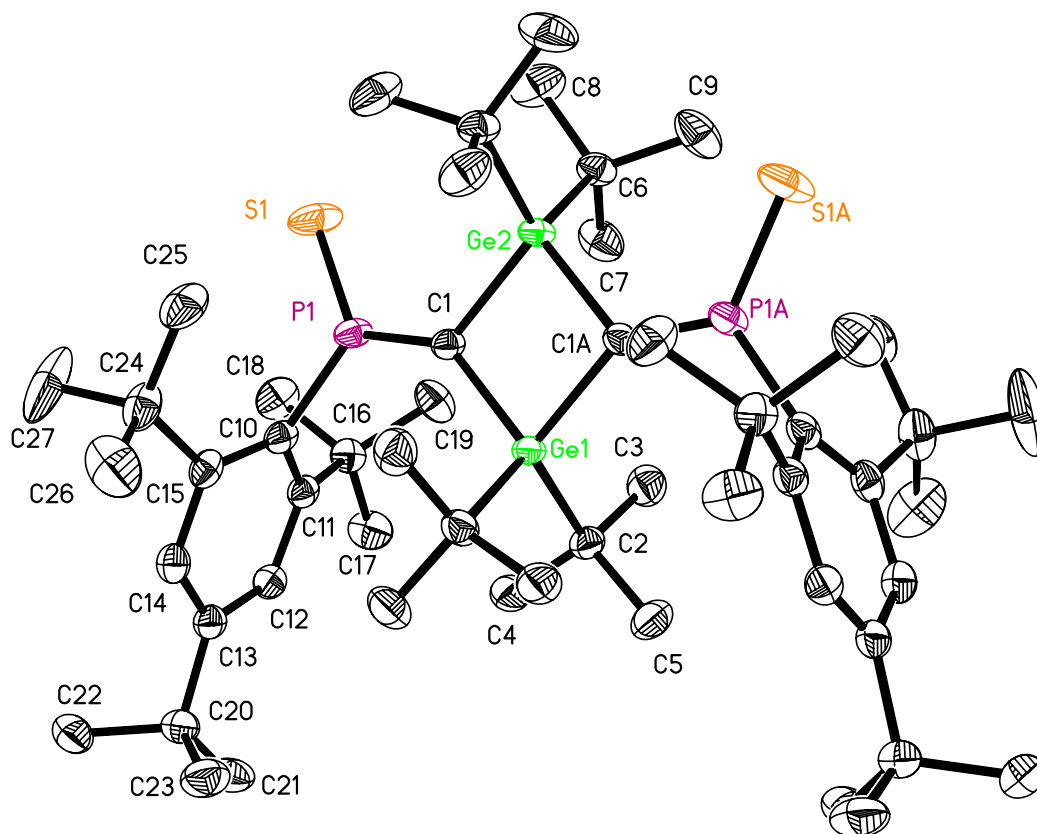

Table 1. Crystal data and structure refinement for **5a**.

|                                   |                                                                               |                  |
|-----------------------------------|-------------------------------------------------------------------------------|------------------|
| Identification code               | <b>5a</b>                                                                     |                  |
| Empirical formula                 | C <sub>54</sub> H <sub>94</sub> Ge <sub>2</sub> P <sub>2</sub> S <sub>2</sub> |                  |
| Formula weight                    | 1014.53                                                                       |                  |
| Temperature                       | 173(2) K                                                                      |                  |
| Wavelength                        | 0.71073 Å                                                                     |                  |
| Crystal system                    | Monoclinic                                                                    |                  |
| Space group                       | C2/c                                                                          |                  |
| Unit cell dimensions              | a = 33.160(3) Å                                                               | α = 90°.         |
|                                   | b = 11.3364(10) Å                                                             | β = 118.224(2)°. |
|                                   | c = 17.1891(15) Å                                                             | γ = 90°.         |
| Volume                            | 5693.4(9) Å <sup>3</sup>                                                      |                  |
| Z                                 | 4                                                                             |                  |
| Density (calculated)              | 1.184 Mg/m <sup>3</sup>                                                       |                  |
| Absorption coefficient            | 1.217 mm <sup>-1</sup>                                                        |                  |
| F(000)                            | 2176                                                                          |                  |
| Crystal size                      | 0.1 x 0.2 x 0.2 mm <sup>3</sup>                                               |                  |
| Theta range for data collection   | 2.15 to 26.40°.                                                               |                  |
| Index ranges                      | -39 ≤ h ≤ 38, -14 ≤ k ≤ 7, -17 ≤ l ≤ 21                                       |                  |
| Reflections collected             | 13514                                                                         |                  |
| Independent reflections           | 5717 [R(int) = 0.0227]                                                        |                  |
| Completeness to theta = 26.40°    | 97.8 %                                                                        |                  |
| Absorption correction             | Semi-empirical                                                                |                  |
| Max. and min. transmission        | 1.000000 and 0.731643                                                         |                  |
| Refinement method                 | Full-matrix least-squares on F <sup>2</sup>                                   |                  |
| Data / restraints / parameters    | 5717 / 0 / 287                                                                |                  |
| Goodness-of-fit on F <sup>2</sup> | 1.035                                                                         |                  |
| Final R indices [I > 2σ(I)]       | R1 = 0.0290, wR2 = 0.0715                                                     |                  |
| R indices (all data)              | R1 = 0.0394, wR2 = 0.0768                                                     |                  |
| Largest diff. peak and hole       | 0.636 and -0.269 e.Å <sup>-3</sup>                                            |                  |





Table 1. Crystal data and structure refinement for **5b**.

|                                   |                                                                                               |          |
|-----------------------------------|-----------------------------------------------------------------------------------------------|----------|
| Identification code               | <b>5b</b>                                                                                     |          |
| Empirical formula                 | C <sub>62</sub> H <sub>110</sub> Ge <sub>2</sub> O <sub>2</sub> P <sub>2</sub> S <sub>2</sub> |          |
| Formula weight                    | 1158.74                                                                                       |          |
| Temperature                       | 173(2) K                                                                                      |          |
| Wavelength                        | 0.71073 Å                                                                                     |          |
| Crystal system                    | Orthorhombic                                                                                  |          |
| Space group                       | Ibam                                                                                          |          |
| Unit cell dimensions              | a = 20.440(3) Å                                                                               | α = 90°. |
|                                   | b = 16.670(2) Å                                                                               | β = 90°. |
|                                   | c = 19.133(3) Å                                                                               | γ = 90°. |
| Volume                            | 6519.2(15) Å <sup>3</sup>                                                                     |          |
| Z                                 | 4                                                                                             |          |
| Density (calculated)              | 1.181 Mg/m <sup>3</sup>                                                                       |          |
| Absorption coefficient            | 1.073 mm <sup>-1</sup>                                                                        |          |
| F(000)                            | 2496                                                                                          |          |
| Crystal size                      | 0.1 x 0.1 x 0.5 mm <sup>3</sup>                                                               |          |
| Theta range for data collection   | 5.11 to 23.53°.                                                                               |          |
| Index ranges                      | -22 ≤ h ≤ 22, -18 ≤ k ≤ 18, -14 ≤ l ≤ 21                                                      |          |
| Reflections collected             | 14548                                                                                         |          |
| Independent reflections           | 2491 [R(int) = 0.1131]                                                                        |          |
| Completeness to theta = 23.53°    | 98.8 %                                                                                        |          |
| Absorption correction             | Semi-empirical                                                                                |          |
| Max. and min. transmission        | 1.000000 and 0.617438                                                                         |          |
| Refinement method                 | Full-matrix least-squares on F <sup>2</sup>                                                   |          |
| Data / restraints / parameters    | 2491 / 260 / 273                                                                              |          |
| Goodness-of-fit on F <sup>2</sup> | 1.049                                                                                         |          |
| Final R indices [I > 2σ(I)]       | R1 = 0.0504, wR2 = 0.1037                                                                     |          |
| R indices (all data)              | R1 = 0.0940, wR2 = 0.1217                                                                     |          |
| Largest diff. peak and hole       | 0.492 and -0.710 e.Å <sup>-3</sup>                                                            |          |

## S2

Table S2-1

B3LYP/6-31G(d) calculated\* energies of model **3** systems.

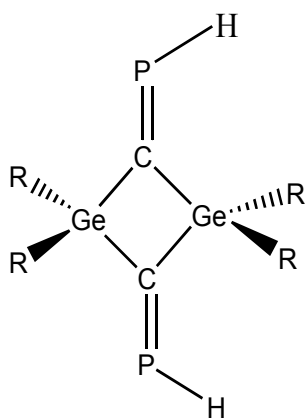

**3a**

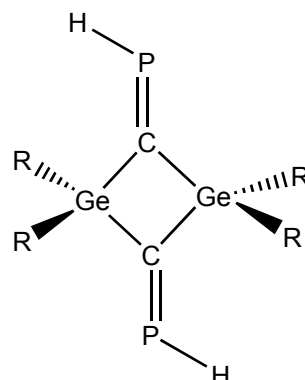

**3b**

| <b>R</b>      | E <b>3a</b> (a.u.) | ZPE<br>(kcal.<br>mol <sup>-1</sup> ) | E <b>3a</b> (a.u.)<br>(corrected) | E <b>3b</b> (a.u.) | ZPE<br>(kcal.<br>mol <sup>-1</sup> ) | E <b>3b</b> (a.u.)<br>(corrected) | Relative<br>energy of<br><b>3a</b> (kcal.<br>mol <sup>-1</sup> ) |
|---------------|--------------------|--------------------------------------|-----------------------------------|--------------------|--------------------------------------|-----------------------------------|------------------------------------------------------------------|
| H             | -4915.9629454      | 44.13                                | -4915.8926198                     | -4915.9629869      | 44.15                                | -4915.8926294                     | +0.01                                                            |
| Me            | -5073.2640401      | 122.79                               | -5073.0683618                     | -5073.2643163      | 122.87                               | -5073.0685105                     | +0.09                                                            |
| <i>t</i> -Bu* | -5544.9853568      |                                      |                                   | -5544.989180       |                                      |                                   | +2.40                                                            |

<sup>a</sup>) Since the ZPE corrections are very similar for the two isomers, they cancel out in the relative energy values.

\*Calculations have been carried out by using Spartan 04 [1]

1) Wavefunction Inc. 18401 Von Karman Avenue, Suite 370 Irvine, CA 92612.

Table S2-2

B3LYP/6-31G(d) calculated energies of model **5** systems

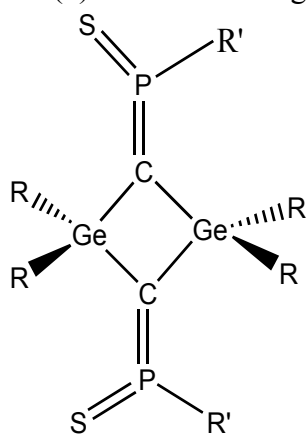

**5a**

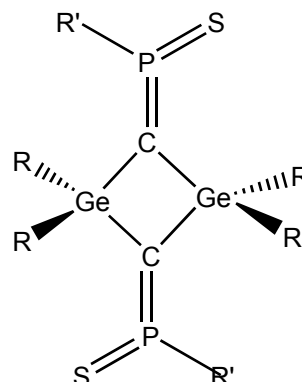

**5b**

| <b>R,R'</b>       | E <b>5a</b> cis<br>(a.u.) | E <b>5b</b> trans<br>(a.u.) | Relative energy of <b>5a</b><br>(kcal.mol <sup>-1</sup> ) |
|-------------------|---------------------------|-----------------------------|-----------------------------------------------------------|
| H, H              | -5712.3755840             | -5712.3760836               | +0.31                                                     |
| Me, H             | -5869.6809540             | -5869.6816550               | +0.43                                                     |
| <i>t</i> -Bu, H   | -6341.4016265             | -6341.4026985               | +0.67                                                     |
| Me, Ph            | -6331.8034295             | -6331.8050588               | +1.02                                                     |
| Me, Mes           | -6567.7062809             | -6567.7070221               | +0.47                                                     |
| <i>t</i> -Bu, Mes | -7039.4089528             | -7039.4104373               | +0.93                                                     |
